# Supplementary material for: Long-Term Safety and Efficacy of Empagliflozin, Sitagliptin, and Metformin
Source: Oxford University Press journal article supplement (doi:10.2337/dc13-0663), 2013-11-02
Supplement: dc130663supplementarydata.pdf [file dc130663supplementarydata.pdf]

## SUPPLEMENTARY DATA

**Austria:** Guntram Schernthaner (PI), Hermann Toplak (PI), Ursula Hanusch-Enserer (PI), Christoph Ebenbichler (PI). **Croatia:** Velimir Božikov (PI), Srećko Tušek (PI), Ema Šunić (PI), Ivana Šunić (SI), Zrinka Boljkovac (SI), Silvija Canecki (PI), Marija Tripolski (SI), Silvija Lešnjaković (SI). **Czech Republic:** Michal Brada (PI), Libor Okénka (PI), Marie Horňáčková (PI), Eva Fenclová (PI). **Estonia:** Riin Lanno (PI), Elina Shelpakova (SI), Kaia Kiiraja (PI), Helena Hansen (SI), Verner Fogel (PI), Marju Past (PI), Ebe Rooks (SI), Maire Lubi (PI), Kaia Tammiksaar (SI). **Finland:** Ilkka Kantola (PI), Jorma Strand (PI), Vuokko Kallioniemi (PI), Arto Strandberg (PI), Sakari Sulosaari (SI). **France:** Guillaume Charpentier (Coord), Paul Valensi (PI), Nabil Assad (Sub Inv), Didier Gouet (PI), Marc Bernardin (Sub Inv), Céline Lukas-Croisier (PI), Odile Verier-Mine (PI), François Dorey (Sub Inv), Jean-Pierre Courreges (PI), Marc Levy (PI), Yves Reznik (PI), Olivier Dupuy (PI). **Germany:** Gunther Claus (PI), Monika Rosenthal (SI), Alexander Segner (PI), Matthias Pein (PI), Dominik Dahl (PI), Andreas Klinge (SI), Ulrich Wendisch (SI), Thomas Konrad (PI), Veronika Wenzl-Bauer (PI), Ulrich Aigner (PI), Gerhard Klausmann (PI), Ernest Schell (PI). **Hungary:** Péter Vörös (PI), Csilla Németh (SI), Szilveszter Dolgos (SI), Marietta Baranyai (PI), Dóra Horváth (SI), Albert Szócs (PI), Endre Adorjáni (SI), Judit Balázsovics (SI), Iván Óry (PI), Tibor Hidvégi (PI), Péter Józsa (SI), Csaba Szauter (SI). **Italy:** Eleuterio Ferrannini (PI), Anna Solini (SI), Stefano Del Prato (PI), Valerio Vallini (SI), Agostino Paccagnella (PI), Massimo Orrash (SI), Maria Sambataro (SI), Giorgio Luciano Viviani (PI). **Korea:** Kun-Ho Yoon (PI), Jae-Hyoung Cho (Sub-I), Sung-Rae Kim (PI), Seong-Su Lee (Sub-I), Hyun-Shik Son (PI), Su-Jin Oh (Sub-I), Tae-Seo Sohn (Sub-I), Jee-In Lee (Sub-I), Kyung-Wan Min (PI), Kyung-Ah Han (Sub-I), Young-Duk Song (PI), Joo-Young Nam (Sub-I), Ie-Byung Park (PI), Young-Sil Eom (Sub-I), Sei-Hyun Kim (Sub-I), Dong-Jun Kim (PI), Jung-Hyun Noh (Sub-I), Yu-Bae Ahn (PI), Seung-Hwan Lee (Sub-I), Seung-Hyun Ko (Sub-I). **Latvia:** Rita Iesalniece (PI), Jelena Sokolova (SI), Valda Stalte (PI), Indra Stelmane (PI), Baiba Jegere (PI), Inta Saknite (SI), Ruta Eglite (PI), Laima Brica (SI), Dace Teterovska (PI), Lija Mora (SI), Valdis Pirags (PI), Rota Ritenberga (SI), Kristine Geldnere (SI), Alda Bumbure (SI). **Lithuania:** Vaidotas Urbanavicius (PI), Liuda Urbanaviciene (SI), Sigitas Stonkus (PI), Antanas Navickas (SI), Rima Zarankiene (SI). **Norway:** Svein Skeie (PI), Hans Olav Høivik (PI), Terje Håskjold (PI), Gisle Langslet (PI). **Romania:** Adriana Dumitrescu (PI), Alina Dia (SI), Lavinia Soava (SI), Ioana Emilia Ferariu (PI), Carmina Alexandru (SI), Mihaela Zarnescu (SI), Magdalena Morosanu (PI), Andreea Morosanu (SI), Carmen Crisan (PI), Adriana Cif (SI), Nadia Ramona Sandu (SI), Marton Reka (SI), Diana Hortensia Barbonta (PI), Cristian Gelu Barbonta (SI), Lavinia Pop (PI), Alina Buduru (SI), Mihaela Mociran (SI), Iosif Szilagyi (PI), Alina Ciorba (SI), Reka Meszaros (SI), Simona Camelia Tivadar (PI), Alexandra Bulgar (SI), Taisia Andreea Dumitra (SI). **Russia:** Olga Smolenskaya (PI), Susanna Kleiner (SI), Lyudmila Starkova (SI), Farida Valeeva (PI), Tatiana Kufelkina (SI), Tatiana Kiselyova (SI), Alfya Valeeva (SI), Leyla Ilyasina (SI), Natalya Vezikova (PI), Tatiana Kulagina (SI), Irina Marusenko (SI), Lyudmila Zharkova (PI), Denis Ilyin (SI), Julia Veselova (SI), Vyacheslav Marasaev (PI), Vladimir Kharchevskiy (Sub Inv), Dmitriy Kharchevskiy (SI), Svetlana Kislova (SI), Veronika Gauert (SI), Olga Ershova (PI), Elena Vasina (SI), Marina Berezina (SI), Olga Krivenkova (SI), Grigoriy Rodoman (PI), Diana Kasaeva (SI), Sergey Minkin (PI), Tatiana Romantsova (PI), Olga Roik (SI), Yuriy Poteshkin (SI), Renata Aynetdinova (SI), Sergey Shustov (PI), Boris Romashevskiy (SI), Ekaterina Balyasnikova (SI), Natalia Vorokhobina (PI), Alla Kuznetsova (SI), Natalia Egorova (SI), Sergeyy Fogt (SI), Ravilya Galakhova (SI), Olga Reshet'ko (PI), Galina Yuneva (SI), Inna Ryzhenkova (SI), Nadezhda Ardentova (SI). **Slovakia:** Jana Dzuptionova (PI), Olga Sisolakova (SI), Adriana Ilavska (PI), Adrian Kratky (SI), Livia Tomasova (PI), Noman Ehsan (PI), Iveta Markova (PI), Daniel Koleny (PI), Katarina Plevova (SI), Lubica Kalinova (PI), Lubica Plevakova (SI), Marek Macko (PI), Augustin Bachraty (SI). **Spain:** Wifred Ricart (PI), Elisabet Costa (SI), Silvia Martín (SI), Jordi Mesa Manteca (PI), Belén Dalama (SI), Sandra Chicharro (SI), Marta Domínguez López (PI), Francisca Linares (SI), Federico Soriguer (SI), Honorato García (PI), Vicente Pereg (SI), María Cladera (SI), María Destard (SI), Juana Ana Nicolau (PI), Lluís Masmiquel (SI), Irene Rodríguez (SI), Josefina

## SUPPLEMENTARY DATA

Olivares (SI), Luis Alberto Gómez (SI), José Antonio Amado (PI), Ricardo Batanero (SI), Luís Vázquez (SI), Ferran Trias (PI), Cristina Delso (SI), Manuela Lizerán (SI). **Sweden:** Bengt-Olov Tengmark (PI), Anders Kempe (PI), Anders Ydmark (PI), Peter Bosson (SI). **Taiwan:** Lee-Ming Chuang (PI), Chih-Yuan Wang (Sub-I), Tien-Jyun Chang (Sub-I), Hung-Yuan Li (Sub-I), Yi-Der Jiang (Sub-I), Jui-Hung Sun (PI), Yu-Yao Huang (Sub-I), Miaw-Jene Liou (Sub-I), Wen-Tsoung Lu (Sub-I), Chih-Ching Wang (Sub-I), Feng-Hsuan Liu (Sub-I), Ming-Nan Chien (PI), Chun-Chuan Lee (Sub-I), Wayne H-H Sheu (PI), I-Te Lee (Sub-I), Shih-Yi Lin (Sub-I), Li-Nien Tseng (Sub-I), Jun-Sing Wang (Sub-I), Shih-Te Tu (PI), Pei-Yung Liao (Sub-I), Shih-Li Su (Sub-I), Shang-Ren Hsu (Sub-I), Shi-Dou Lin (Sub-I), Shu-Yi Wang (Sub-I), Chien-Wen Chou (PI), Chwen-Yi Yang (Sub-I), Jung-Fu Chen (PI), Ming-Chun Kuo (Sub-I), Feng-Chih Shen (Sub-I). **Ukraine:** Sergii Shevchuk (PI), Iurii Bezsmertnyi (SI), Larysa Pentiuk (SI), Olena Voloshyna (PI), Olga Ducova (SI), Olena Naydenova (SI), Lesya Bobronnikova (PI), Volodymyr Khvorostinka (former PI), Ivan Smirnov (SI), Yury Mostovoy (PI), Natalia Slepchenko (SI), Halyna Tomashkevych (SI), Maryna Vlasenko (PI), Anna Slobodianuk (SI), Svitlana Litvinova (SI), Natalia Pertseva (PI), Inna Yarova (SI), Olena Gurzhiy (SI), Oleksandr Larin (PI), Dmitriy Kogut (SI), Galyna Kidalova (SI), Boris Mankovsky (SI), Oleksiy Korzh (PI), Sergiy Krasnokutskiy (SI), Artem Liashok (SI), Natalia Vaskiv (SI), Mykola Iabluchanskyi (PI), Olena Tomina (SI), Larysa Martymianova (SI). **United States:** Joseph Barrera (PI), Mim Mulford (Sub-I), Paul Denker (PI), Paul Dimarco (Sub-I), Juan Espinosa Paccini (PI), Matthew Finneran (PI), Michele Coleman (Sub-I), Timothy Coleman (Sub-I), Robert Crawford (Sub-I), Michelle Lees (Sub-I), Janet Finneran (Sub-I), John Reed (PI), Robert Steed (Sub-I), Vijayasudha Gunna (Sub-I), Carol Shellabarger (Sub-I), Cynthia Brown (Sub-I), Donni Jester (Sub-I), Julio Rosenstock (PI), Howard Baum (Sub-I), Salomon Banerer (Sub-I), Wendy Kniffen (Sub-I), Jeffery Rothman (PI), Shahed Quyyumi (Sub-I), Neil Cohen (Sub-I), Phillip Pearlstein (PI), Robert Pearlstein (Sub-I), James Covalesky (Sub-I), David Thorne (PI), John Wilker (Sub-I), Charles Powers (Sub-I), Christopher Baur (Sub-I), Larry Stonesifer (PI), Marcia Miller (Sub-I), Ronald Graf (Sub-I), Leonard Chuck (PI), Lambert Chee (Sub-I), Mark Christiansen (Sub-I), Helen Stacey (Sub-I), Richard Weinstein (Sub-I), Robert Lipetz (PI), Darren Farnesi (Sub-I).

SUPPLEMENTARY DATA

**Supplementary Figure 1.** Study design. A total of 106 patients received 10 mg empagliflozin as monotherapy and 166 received 10 mg empagliflozin as add-on to metformin in this extension trial. Of these, 80 and 137, respectively, had received empagliflozin (monotherapy or as add-on to metformin) and 26 and 29, respectively, had received placebo in Study 1 or Study 2. A total of 109 patients received 25 mg empagliflozin as monotherapy and 166 received 25 mg empagliflozin as add-on to metformin in this extension trial. Of these, 88 and 139, respectively, had received empagliflozin (monotherapy or as add-on to metformin) and 21 and 27, respectively, had received placebo in Study 1 or Study 2. 56 patients continued metformin and 56 patients continued sitagliptin in the extension trial.

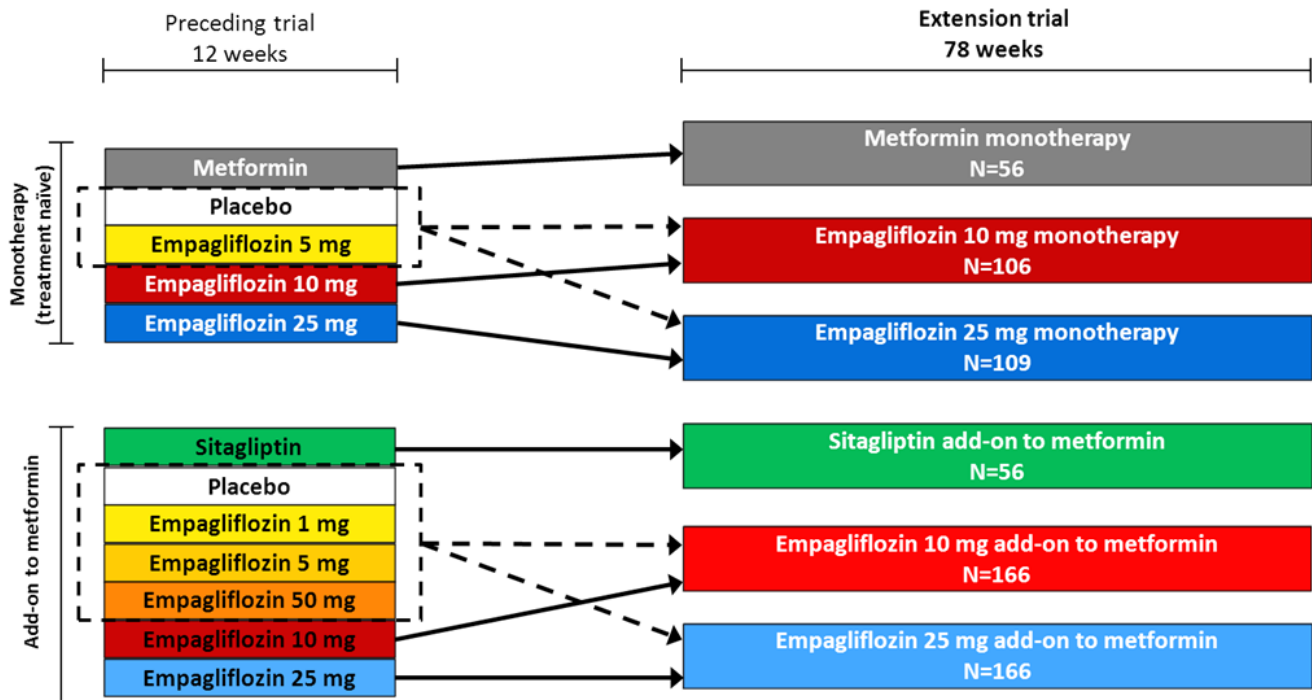

**Supplementary Figure 2.** Mean  $\pm$  SE change from baseline in eGFR over 90 weeks in patients who received monotherapy with 10 mg empagliflozin, 25 mg empagliflozin, or metformin IR in Study 1 without re-randomization at the start of the extension trial (panel 1), and who received 10 mg empagliflozin, 25 mg empagliflozin, or sitagliptin as add-on to metformin therapy in Study 2, without re-randomization at the start of the extension trial (panel 2). Observed cases. Based on ANCOVA model with treatment group, number of previously used antidiabetic medications as fixed effects, baseline eGFR as covariate, and country as random effect.

SUPPLEMENTARY DATA

Panel 1

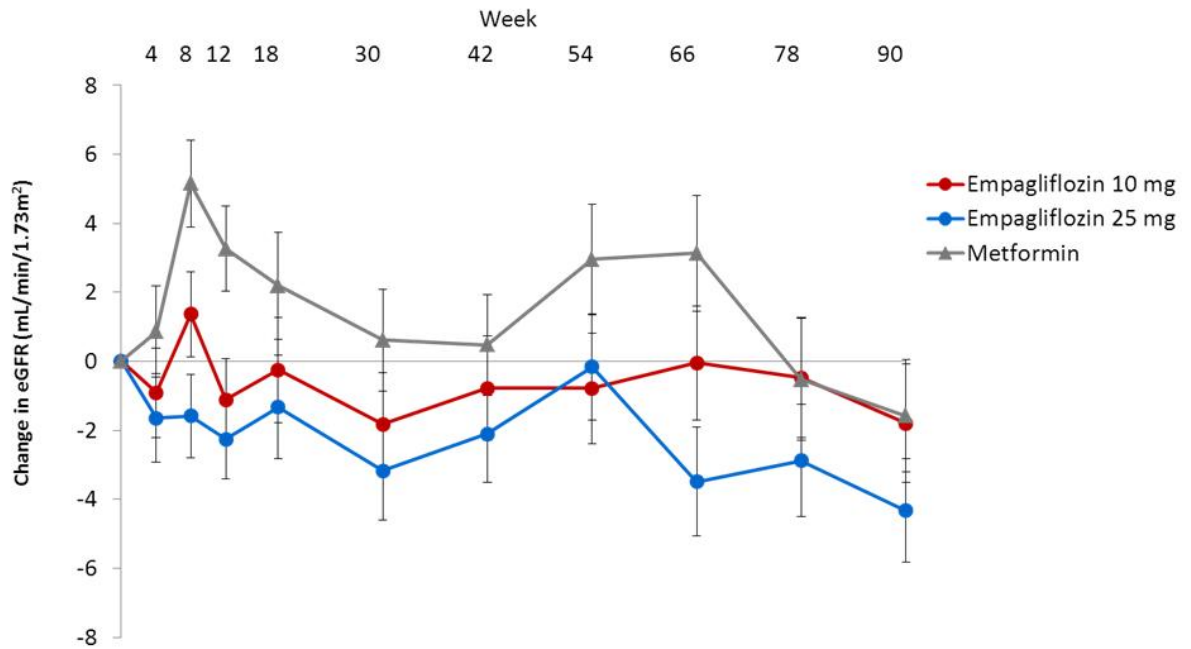

Number of patients analysed

|                     |    |    |    |    |    |    |    |    |    |    |
|---------------------|----|----|----|----|----|----|----|----|----|----|
| Empagliflozin 10 mg | 80 | 79 | 76 | 55 | 50 | 49 | 49 | 50 | 49 | 43 |
| Empagliflozin 25 mg | 81 | 80 | 80 | 57 | 55 | 56 | 54 | 55 | 55 | 55 |
| Metformin           | 77 | 75 | 72 | 54 | 53 | 52 | 50 | 49 | 48 | 47 |

Panel 2

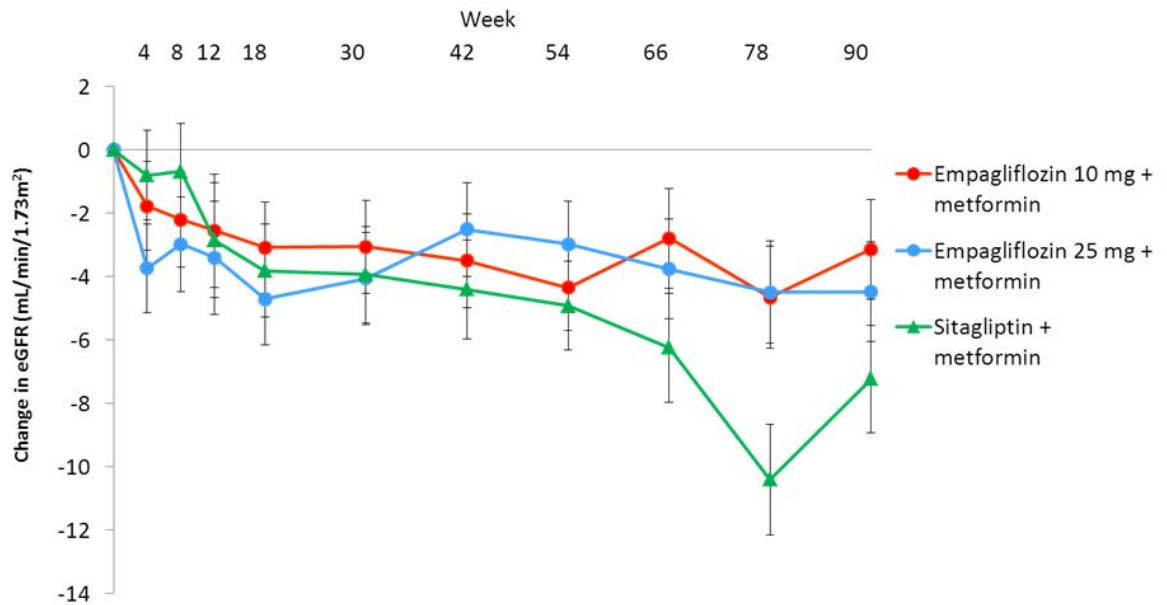

Number of patients analysed

|                                 |    |    |    |    |    |    |    |    |    |    |
|---------------------------------|----|----|----|----|----|----|----|----|----|----|
| Empagliflozin 10 mg + metformin | 68 | 67 | 65 | 53 | 52 | 49 | 48 | 49 | 47 | 46 |
| Empagliflozin 25 mg + metformin | 69 | 69 | 70 | 53 | 50 | 49 | 46 | 47 | 47 | 45 |
| Sitagliptin + metformin         | 71 | 69 | 69 | 52 | 47 | 45 | 44 | 40 | 41 | 39 |
